# Supplementary material for: Association between the monocyte-to-high-density lipoprotein cholesterol ratio and adult psoriasis: evidence from the NHANES
Source: Research Square preprint supplement (doi:10.21203/rs.3.rs-4937946/v1), 2024-10-17
Supplement: Supplementary file 1 [file c758dbd2fa46399ac58325ef.docx]

Table 1

Baseline characteristics of the study population according to MHR quartiles.

| ­ | Q1  (n=3933) | Q2  (n=3947) | Q3  (n=4031) | Q4  (n=3984) | P value |
| --- | --- | --- | --- | --- | --- |
| Age (years) | 49.5167 ± 17.0201 | 48.7223 ± 17.7317 | 48.8196 ± 17.7627 | 49.2467 ± 18.0935 | 0.154 |
| Gender (%) |  |  |  |  | <0.001 |
| Men | 30.1805% | 42.4880% | 54.1801% | 67.0683% |  |
| Women | 69.8195% | 57.5120% | 45.8199% | 32.9317% |  |
| Race (%) |  |  |  |  | <0.001 |
| Mexican American | 11.8739% | 14.6440% | 15.0087% | 15.1606% |  |
| Other Hispanic | 8.8482% | 9.6022% | 10.3944% | 10.2912% |  |
| Non-Hispanic White | 37.0455% | 40.9932% | 45.2741% | 51.0542% |  |
| Non-Hispanic Black | 27.0023% | 22.4728% | 18.0104% | 14.5080% |  |
| Other Races | 15.2301% | 12.2878% | 11.3123% | 8.9859% |  |
| Education level (%) |  |  |  |  | <0.001 |
| Less than high school | 20.4170% | 24.7276% | 24.9070% | 28.2380% |  |
| High school or GED | 19.9593% | 20.9526% | 22.2525% | 25.1757% |  |
| Above high school | 59.6237% | 54.3197% | 52.8405% | 46.5863% |  |
| Alcohol intake (%) | 0.4067 ± 0.6026 | 0.4598 ± 0.6594 | 0.4973 ± 0.7021 | 0.5318 ± 0.7500 | <0.001 |
| Smoking (%) |  |  |  |  | <0.001 |
| No | 63.5901% | 58.8802% | 53.8824% | 46.4859% |  |
| Yes | 36.4099% | 41.1198% | 46.1176% | 53.5141% |  |
| History of diabetes (%) |  |  |  |  | <0.001 |
| No | 91.8383% | 88.8776% | 86.5294% | 84.0863% |  |
| Yes | 8.1617% | 11.1224% | 13.4706% | 15.9137% |  |
| Coronary artery disease (%) |  |  |  |  | <0.001 |
| No | 98.1693% | 97.2637% | 95.4354% | 93.5743% |  |
| Yes | 1.8307% | 2.7363% | 4.5646% | 6.4257% |  |
| Congestive heart failure (%) |  |  |  |  | <0.001 |
| No | 98.3982% | 97.4918% | 96.9486% | 94.9799% |  |
| Yes | 1.6018% | 2.5082% | 3.0514% | 5.0201% |  |
| Stroke (%) |  |  |  |  | <0.001 |
| No | 97.1269% | 96.8077% | 96.3036% | 95.3564% |  |
| Yes | 2.8731% | 3.1923% | 3.6964% | 4.6436% |  |

Table 2 shows the association between MHR and psoriasis.

|  | Model 1 | Model 2 | Model 3 |
| --- | --- | --- | --- |
|  | OR (95% CI) P value | OR (95% CI) P value | OR (95% CI) P value |
| MHR | 1.473 (1.214, 1.787) 0.00009 | 1.439 (1.172, 1.767) 0.00051 | 1.327 (1.077, 1.635) 0.00785 |
| MHR Quartiles |  |  |  |
| Quartile 1 | Reference | Reference | Reference |
| Quartile 2 | 1.097 (0.823, 1.463) 0.52595 | 1.103 (0.826, 1.474) 0.50529 | 1.071 (0.801, 1.432) 0.64418 |
| Quartile 3 | 1.273 (0.965, 1.680) 0.08751 | 1.256 (0.946, 1.668) 0.11456 | 1.179 (0.887, 1.567) 0.25808 |
| Quartile 4 | 1.560 (1.195, 2.038) 0.00109 | 1.515 (1.143, 2.009) 0.00387 | 1.364 (1.026, 1.815) 0.03291 |
| P for trend | 0.036 (0.031, 0.041) <0.001 | 0.035 (0.030, 0.041) <0.001 | 0.032 (0.028, 0.037) 0.008 |

Subgroup analysis for the association between MHR and psoriasis.

|  | **Odds Ratio(95%Cl)** | **P for trend** | **P for interaction** |
| --- | --- | --- | --- |
| **Sex** |  |  | 0.4215 |
| Male | 1.448 (1.075, 1.948) 0.0147 | 0.0131 |  |
| Female | 1.226 (0.922, 1.629) 0.1605 | 0.2270 |  |
| **Race** |  |  | 0.1841 |
| Mexican American | 1.751 (0.828, 3.704) 0.1427 | 0.1351 |  |
| Other Hispanic | 0.989 (0.468, 2.091) 0.9777 | 0.9778 |  |
| Non-Hispanic White | 1.122 (0.853, 1.475) 0.4106 | 0.3740 |  |
| Non-Hispanic Black | 1.836 (0.999, 3.376) 0.0505 | 0.0502 |  |
| Other Races | 2.204 (1.201, 4.045) 0.0108 | 0.0152 |  |
| **Education level** |  |  | 0.3343 |
| Less than high school | 1.285 (0.825, 2.001) 0.2677 | 0.3021 |  |
| High school or GED | 0.963 (0.622, 1.491) 0.8660 | 0.8722 |  |
| Above high school | 1.521 (1.146, 2.019) 0.0037 | 0.0035 |  |
| **Smoking** |  |  | 0.7204 |
| No | 1.388 (1.012, 1.903) 0.0421 | 0.0421 |  |
| Yes | 1.287 (0.981, 1.689) 0.0688 | 0.0789 |  |
| **History of diabetes** |  |  | 0.2132 |
| No | 1.415 (1.126, 1.776) 0.0028 | 0.0031 |  |
| Yes | 0.982 (0.581, 1.661) 0.9464 | 0.9524 |  |
| **Coronary artery disease** |  |  | 0.7013 |
| No | 1.341 (1.081, 1.665) 0.0077 | 0.0091 |  |
| Yes | 1.133 (0.491, 2.613) 0.7703 | 0.7453 |  |
| **Congestive heart failure** |  |  | 0.2257 |
| No | 1.371 (1.107, 1.699) 0.0039 | 0.0045 |  |
| Yes | 0.766 (0.307, 1.916) 0.5691 | 0.6667 |  |
| **Stroke** |  |  | 0.0865 |
| No | 1.374 (1.109, 1.701) 0.0036 | 0.0041 |  |
| Yes | 0.579 (0.222, 1.510) 0.2640 | 0.1609 |  |
